# Supplementary material for: Nitrogen Removal from Landfill Leachate Using Biochar Derived from Wheat Straw
Source: MDPI journal article supplement (doi:10.3390/ma17040928), 2024-02-17
Supplement: s1 [file s1]

**SUPPLEMENTARY**  
**Nitrogen Removal from Landfill Leachate Using Biochar Derived from Wheat Straw**

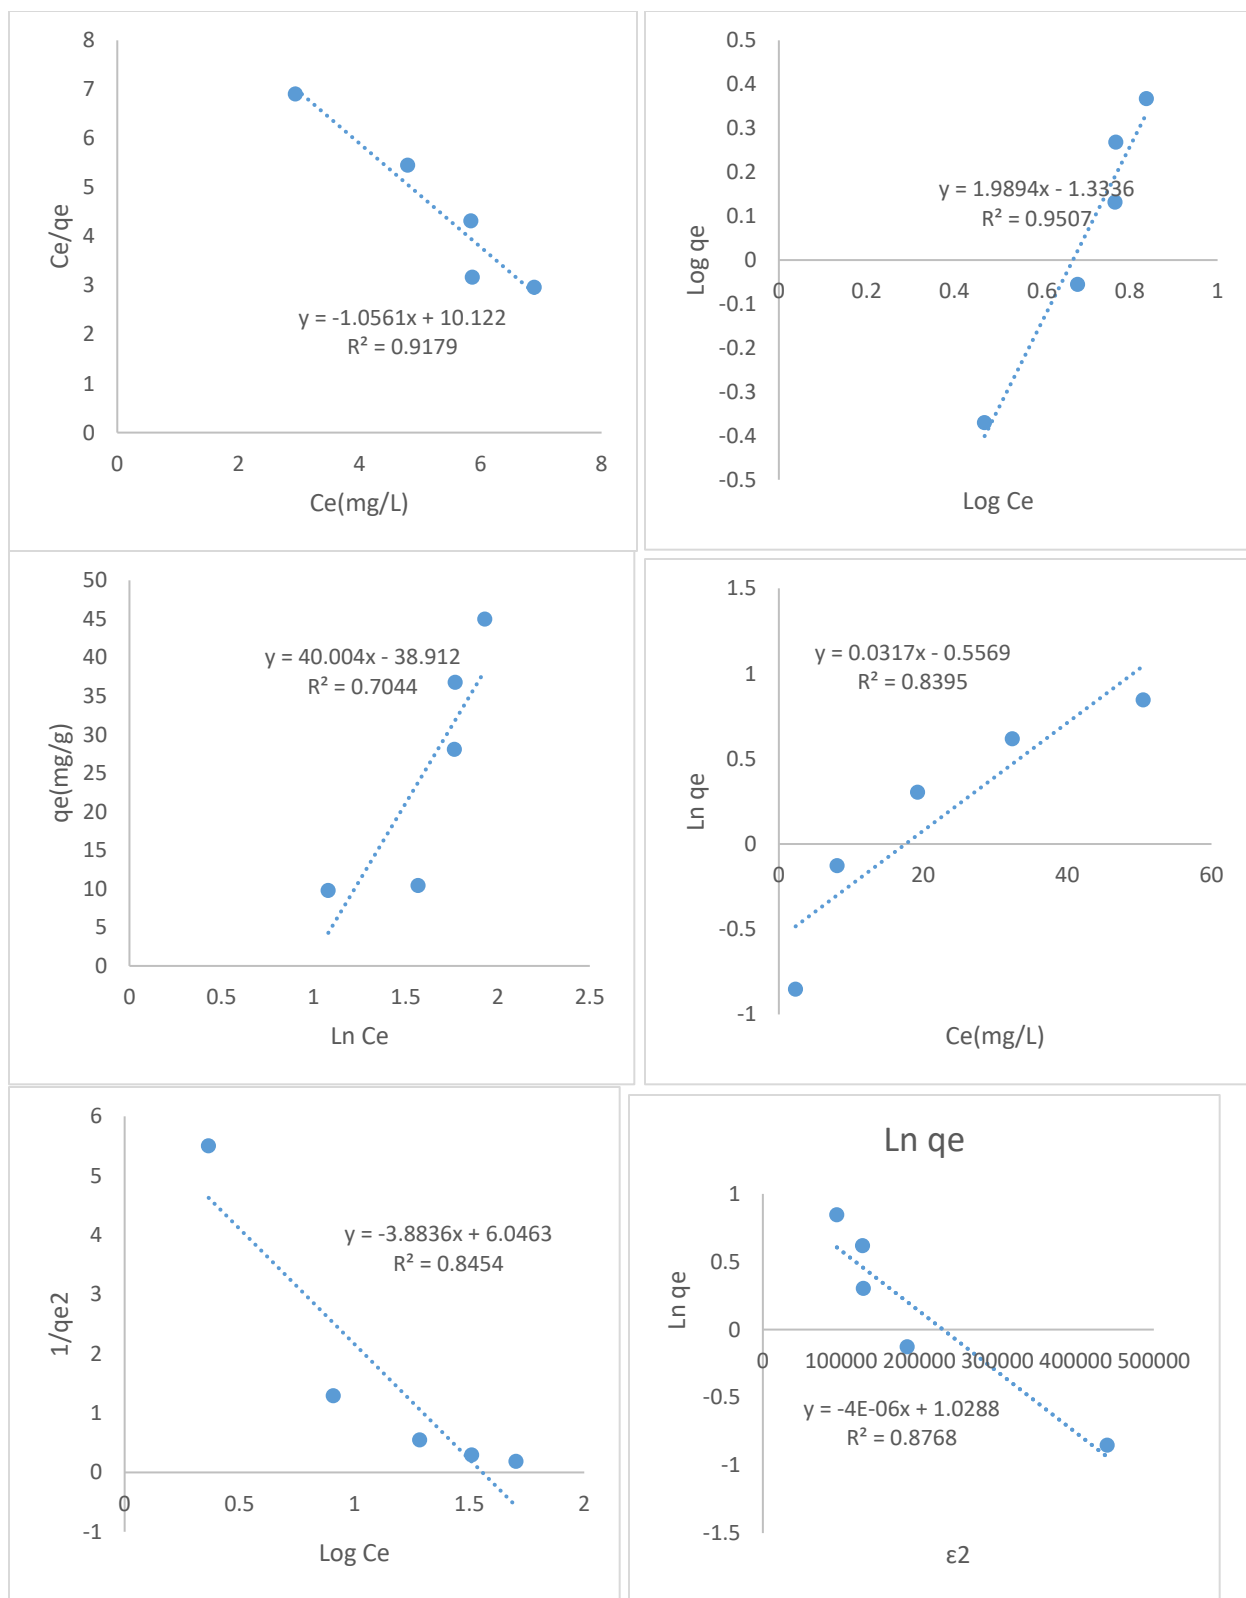

**Figure S1.** (a) Langmuir, (b) Freundlich, (c) Tempkin, (d) Jovanovich, (e) Harkin-Jura and (f) Dubinin-Radushkevich isotherms of nitrogen removal from  $\text{NH}_4\text{Cl}$  solution by AC.

**SUPPLEMENTARY**  
**Nitrogen Removal from Landfill Leachate Using Biochar Derived from Wheat Straw**

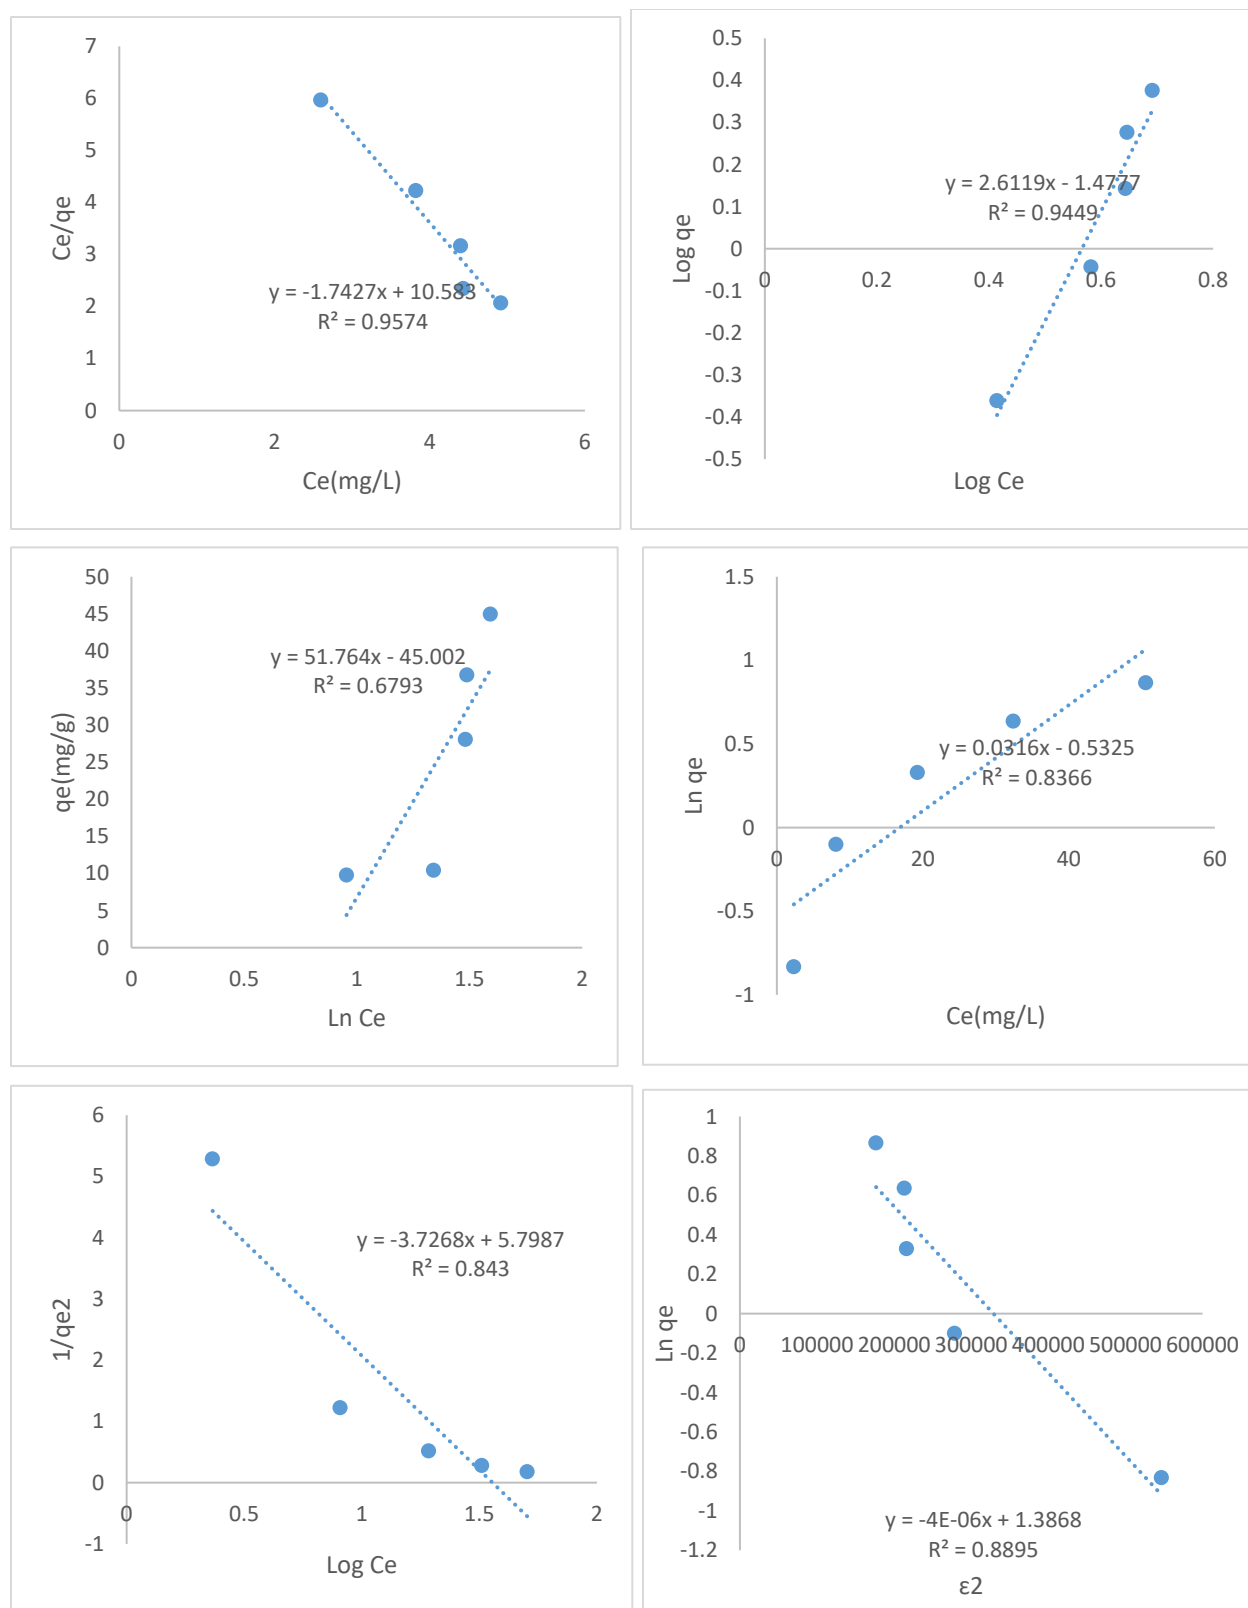

**Figure S2.** Langmuir, (b) Freundlich, (c) Tempkin, (d) Jovanovich, (e) Harkin-Jura and (f) Dubinin-Radushkevich isotherms of nitrogen removal from  $\text{NH}_4\text{Cl}$  solution by BC.

**SUPPLEMENTARY**  
**Nitrogen Removal from Landfill Leachate Using Biochar Derived from Wheat Straw**

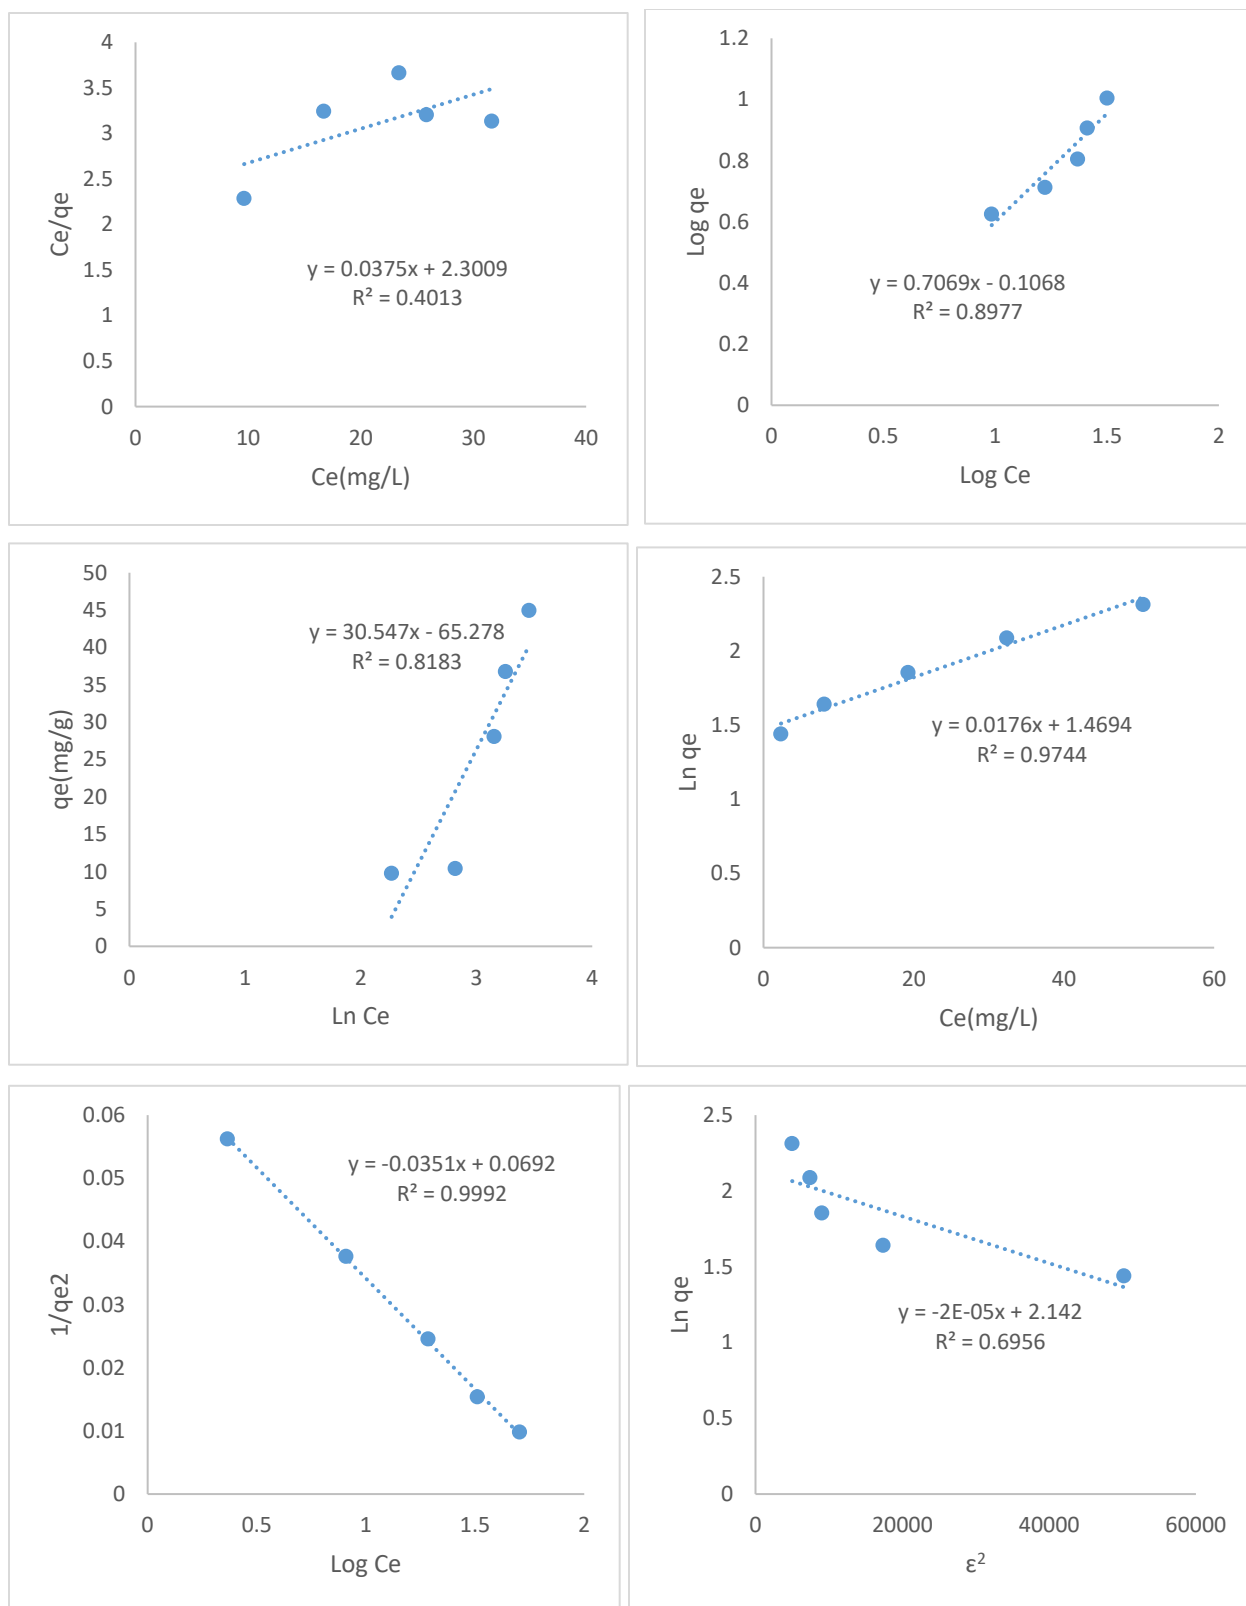

**Figure S3.** Langmuir, (b) Freundlich, (c) Temkin, (d) Jovanovich, (e) Harkin-Jura and (f) Dubinin-Radushkevich isotherms of nitrogen removal from LLCH by BC.
